# Supplementary material for: Retrieval practice facilitates memory updating by enhancing and differentiating medial prefrontal cortex representations
Source: eLife. 2020 May 18;9:e57023. doi: 10.7554/eLife.57023 (PMC7272192; doi:10.7554/eLife.57023)
Supplement: Figure 1—source data 2. [file elife-57023-fig1-data2.csv]

sub_id	update_cond	response_type	proportion
001	retprac	target	0.3582089552238806
001	retprac	competitor	0.417910447761194
001	retprac	other	0.22388059701492538
001	restudy	target	0.2676056338028169
001	restudy	competitor	0.4647887323943662
001	restudy	other	0.2676056338028169
002	retprac	target	0.4305555555555556
002	retprac	competitor	0.4305555555555556
002	retprac	other	0.1388888888888889
002	restudy	target	0.4861111111111111
002	restudy	competitor	0.4027777777777778
002	restudy	other	0.1111111111111111
003	retprac	target	0.5846153846153846
003	retprac	competitor	0.2
003	retprac	other	0.2153846153846154
003	restudy	target	0.4225352112676056
003	restudy	competitor	0.38028169014084506
003	restudy	other	0.19718309859154928
004	retprac	target	0.5571428571428572
004	retprac	competitor	0.2857142857142857
004	retprac	other	0.15714285714285714
004	restudy	target	0.3188405797101449
004	restudy	competitor	0.391304347826087
004	restudy	other	0.2898550724637681
005	retprac	target	0.45454545454545453
005	retprac	competitor	0.3939393939393939
005	retprac	other	0.15151515151515152
005	restudy	target	0.3
005	restudy	competitor	0.44285714285714284
005	restudy	other	0.2571428571428571
006	retprac	target	0.3484848484848485
006	retprac	competitor	0.45454545454545453
006	retprac	other	0.19696969696969696
006	restudy	target	0.3620689655172414
006	restudy	competitor	0.46551724137931033
006	restudy	other	0.1724137931034483
007	retprac	target	0.582089552238806
007	retprac	competitor	0.26865671641791045
007	retprac	other	0.14925373134328357
007	restudy	target	0.463768115942029
007	restudy	competitor	0.3188405797101449
007	restudy	other	0.21739130434782608
008	retprac	target	0.5633802816901409
008	retprac	competitor	0.4225352112676056
008	retprac	other	0.014084507042253521
008	restudy	target	0.4722222222222222
008	restudy	competitor	0.4305555555555556
008	restudy	other	0.09722222222222222
009	retprac	target	0.5211267605633803
009	retprac	competitor	0.323943661971831
009	retprac	other	0.15492957746478872
009	restudy	target	0.38571428571428573
009	restudy	competitor	0.35714285714285715
009	restudy	other	0.2571428571428571
010	retprac	target	0.4722222222222222
010	retprac	competitor	0.375
010	retprac	other	0.1527777777777778
010	restudy	target	0.4507042253521127
010	restudy	competitor	0.38028169014084506
010	restudy	other	0.16901408450704225
011	retprac	target	0.42424242424242425
011	retprac	competitor	0.25757575757575757
011	retprac	other	0.3181818181818182
011	restudy	target	0.40350877192982454
011	restudy	competitor	0.3333333333333333
011	restudy	other	0.2631578947368421
012	retprac	target	0.49230769230769234
012	retprac	competitor	0.26153846153846155
012	retprac	other	0.24615384615384617
012	restudy	target	0.2753623188405797
012	restudy	competitor	0.5507246376811594
012	restudy	other	0.17391304347826086
013	retprac	target	0.45454545454545453
013	retprac	competitor	0.25757575757575757
013	retprac	other	0.2878787878787879
013	restudy	target	0.359375
013	restudy	competitor	0.34375
013	restudy	other	0.296875
014	retprac	target	0.3787878787878788
014	retprac	competitor	0.2878787878787879
014	retprac	other	0.3333333333333333
014	restudy	target	0.328125
014	restudy	competitor	0.375
014	restudy	other	0.296875
015	retprac	target	0.5263157894736842
015	retprac	competitor	0.3508771929824561
015	retprac	other	0.12280701754385964
015	restudy	target	0.32075471698113206
015	restudy	competitor	0.4716981132075472
015	restudy	other	0.20754716981132076
016	retprac	target	0.5172413793103449
016	retprac	competitor	0.3448275862068966
016	retprac	other	0.13793103448275862
016	restudy	target	0.3958333333333333
016	restudy	competitor	0.5208333333333334
016	restudy	other	0.08333333333333333
017	retprac	target	0.49295774647887325
017	retprac	competitor	0.352112676056338
017	retprac	other	0.15492957746478872
017	restudy	target	0.4307692307692308
017	restudy	competitor	0.4153846153846154
017	restudy	other	0.15384615384615385
018	retprac	target	0.5070422535211268
018	retprac	competitor	0.39436619718309857
018	retprac	other	0.09859154929577464
018	restudy	target	0.4507042253521127
018	restudy	competitor	0.4507042253521127
018	restudy	other	0.09859154929577464
019	retprac	target	0.44776119402985076
019	retprac	competitor	0.23880597014925373
019	retprac	other	0.31343283582089554
019	restudy	target	0.391304347826087
019	restudy	competitor	0.2753623188405797
019	restudy	other	0.3333333333333333
