# Supplementary material for: Retrieval practice facilitates memory updating by enhancing and differentiating medial prefrontal cortex representations
Source: eLife. 2020 May 18;9:e57023. doi: 10.7554/eLife.57023 (PMC7272192; doi:10.7554/eLife.57023)
Supplement: Figure 3—source data 1. [file elife-57023-fig3-data1.csv]

sub_id	roi_id	update_cond	reactivation_type	evidence
001	MPFC	retprac	target	0.10012832835820895
001	MPFC	retprac	competitor	-0.0547484776119403
001	MPFC	restudy	target	0.06559581690140846
001	MPFC	restudy	competitor	-0.04091798591549296
002	MPFC	retprac	target	0.04703680555555556
002	MPFC	retprac	competitor	0.07682159722222222
002	MPFC	restudy	target	-0.054197999999999996
002	MPFC	restudy	competitor	0.036087319444444446
003	MPFC	retprac	target	-0.004190723076923072
003	MPFC	retprac	competitor	-0.01092907692307693
003	MPFC	restudy	target	-0.0025905211267605623
003	MPFC	restudy	competitor	-0.002141366197183104
004	MPFC	retprac	target	0.07978672857142857
004	MPFC	retprac	competitor	0.0943188857142857
004	MPFC	restudy	target	0.062043289855072466
004	MPFC	restudy	competitor	0.138539
005	MPFC	retprac	target	0.023787878787878792
005	MPFC	retprac	competitor	0.07213136363636363
005	MPFC	restudy	target	0.022592599999999997
005	MPFC	restudy	competitor	-0.021668957142857142
006	MPFC	retprac	target	0.009521818181818189
006	MPFC	retprac	competitor	-0.015465106060606063
006	MPFC	restudy	target	-0.09769839655172413
006	MPFC	restudy	competitor	-0.03827074137931034
007	MPFC	retprac	target	-0.03498831343283582
007	MPFC	retprac	competitor	-0.05619428358208956
007	MPFC	restudy	target	-0.012105681159420293
007	MPFC	restudy	competitor	-0.009667492753623188
008	MPFC	retprac	target	0.13313404225352113
008	MPFC	retprac	competitor	0.06130833802816901
008	MPFC	restudy	target	0.05046108333333334
008	MPFC	restudy	competitor	0.12067906944444445
009	MPFC	retprac	target	0.051209605633802814
009	MPFC	retprac	competitor	0.03484939436619718
009	MPFC	restudy	target	0.037747114285714284
009	MPFC	restudy	competitor	0.03816044285714286
010	MPFC	retprac	target	0.09504677777777779
010	MPFC	retprac	competitor	0.06561569444444444
010	MPFC	restudy	target	0.07320891549295774
010	MPFC	restudy	competitor	0.10574297183098591
011	MPFC	retprac	target	0.05115645454545455
011	MPFC	retprac	competitor	0.06687707575757576
011	MPFC	restudy	target	-0.10388814035087719
011	MPFC	restudy	competitor	0.01847149122807017
012	MPFC	retprac	target	0.07782253846153846
012	MPFC	retprac	competitor	0.05975109230769231
012	MPFC	restudy	target	0.0025498260869565173
012	MPFC	restudy	competitor	0.03883492753623188
013	MPFC	retprac	target	0.06252404545454546
013	MPFC	retprac	competitor	0.041481318181818175
013	MPFC	restudy	target	0.031157765625000007
013	MPFC	restudy	competitor	0.04136115625
014	MPFC	retprac	target	0.06598275757575757
014	MPFC	retprac	competitor	0.06281060606060607
014	MPFC	restudy	target	-0.081620546875
014	MPFC	restudy	competitor	-0.004855015625000001
015	MPFC	retprac	target	-2.101754385964974e-4
015	MPFC	retprac	competitor	-0.06668456140350879
015	MPFC	restudy	target	0.09921139622641509
015	MPFC	restudy	competitor	0.04998571698113207
016	MPFC	retprac	target	0.08506212068965517
016	MPFC	retprac	competitor	0.07594848275862069
016	MPFC	restudy	target	0.083899125
016	MPFC	restudy	competitor	0.136443625
017	MPFC	retprac	target	0.09670359154929577
017	MPFC	retprac	competitor	0.03444787323943662
017	MPFC	restudy	target	-0.01030107692307693
017	MPFC	restudy	competitor	-0.06276569230769231
018	MPFC	retprac	target	0.07350560563380282
018	MPFC	retprac	competitor	0.0683914647887324
018	MPFC	restudy	target	0.023072239436619724
018	MPFC	restudy	competitor	0.14112805633802816
019	MPFC	retprac	target	0.04479517910447761
019	MPFC	retprac	competitor	0.037151776119402985
019	MPFC	restudy	target	-0.005096652173913051
019	MPFC	restudy	competitor	-7.237971014492768e-4
001	VTC	retprac	target	0.026247582089552243
001	VTC	retprac	competitor	0.060059462686567165
001	VTC	restudy	target	0.015656971830985918
001	VTC	restudy	competitor	0.03623516901408451
002	VTC	retprac	target	0.0464035
002	VTC	retprac	competitor	0.047491930555555555
002	VTC	restudy	target	0.07309309722222222
002	VTC	restudy	competitor	0.13303955555555555
003	VTC	retprac	target	0.06231796923076924
003	VTC	retprac	competitor	0.10262061538461538
003	VTC	restudy	target	0.057705309859154924
003	VTC	restudy	competitor	0.08169697183098591
004	VTC	retprac	target	0.09576558571428573
004	VTC	retprac	competitor	0.02250522857142858
004	VTC	restudy	target	0.07836728985507246
004	VTC	restudy	competitor	0.12419284057971014
005	VTC	retprac	target	-0.03028618181818182
005	VTC	retprac	competitor	0.03427592424242425
005	VTC	restudy	target	0.07241385714285714
005	VTC	restudy	competitor	0.03268265714285715
006	VTC	retprac	target	0.061015181818181816
006	VTC	retprac	competitor	0.04589143939393939
006	VTC	restudy	target	0.07666156896551725
006	VTC	restudy	competitor	0.08649917241379311
007	VTC	retprac	target	0.06755386567164179
007	VTC	retprac	competitor	-0.004535343283582089
007	VTC	restudy	target	0.027186550724637687
007	VTC	restudy	competitor	0.06777810144927536
008	VTC	retprac	target	0.136518338028169
008	VTC	retprac	competitor	0.09668343661971832
008	VTC	restudy	target	0.032997180555555554
008	VTC	restudy	competitor	0.16385094444444445
009	VTC	retprac	target	0.07789145070422535
009	VTC	retprac	competitor	0.02429757746478874
009	VTC	restudy	target	0.0307131
009	VTC	restudy	competitor	0.0569624
010	VTC	retprac	target	0.03598427777777778
010	VTC	retprac	competitor	0.031300875000000006
010	VTC	restudy	target	0.050022112676056336
010	VTC	restudy	competitor	0.10954576056338028
011	VTC	retprac	target	-0.06423987878787879
011	VTC	retprac	competitor	-0.0395949090909091
011	VTC	restudy	target	-6.62280701754409e-5
011	VTC	restudy	competitor	0.13323029824561403
012	VTC	retprac	target	0.02160340000000001
012	VTC	retprac	competitor	0.006301938461538463
012	VTC	restudy	target	0.04327520289855072
012	VTC	restudy	competitor	0.014586521739130429
013	VTC	retprac	target	0.09590628787878788
013	VTC	retprac	competitor	0.1338122121212121
013	VTC	restudy	target	0.070674828125
013	VTC	restudy	competitor	0.052782421875
014	VTC	retprac	target	0.041212454545454545
014	VTC	retprac	competitor	0.0611474696969697
014	VTC	restudy	target	0.048944140625
014	VTC	restudy	competitor	0.07372271875
015	VTC	retprac	target	0.03331143859649122
015	VTC	retprac	competitor	0.029360403508771928
015	VTC	restudy	target	0.13741090566037736
015	VTC	restudy	competitor	0.20753696226415094
016	VTC	retprac	target	0.1244938448275862
016	VTC	retprac	competitor	0.16535515517241378
016	VTC	restudy	target	0.07579091666666667
016	VTC	restudy	competitor	0.2176081875
017	VTC	retprac	target	0.036639746478873234
017	VTC	retprac	competitor	0.10542364788732395
017	VTC	restudy	target	0.10492186153846154
017	VTC	restudy	competitor	0.15791186153846154
018	VTC	retprac	target	0.05481391549295775
018	VTC	retprac	competitor	0.04749747887323945
018	VTC	restudy	target	0.07725971830985916
018	VTC	restudy	competitor	0.07730659154929577
019	VTC	retprac	target	0.028422910447761192
019	VTC	retprac	competitor	0.023040298507462687
019	VTC	restudy	target	0.05171323188405797
019	VTC	restudy	competitor	-0.004707318840579713
001	AG	retprac	target	0.05210288059701492
001	AG	retprac	competitor	0.03151286567164179
001	AG	restudy	target	-0.0027377746478873238
001	AG	restudy	competitor	0.038311352112676056
002	AG	retprac	target	-0.030934777777777776
002	AG	retprac	competitor	-0.01886338888888889
002	AG	restudy	target	0.035336680555555555
002	AG	restudy	competitor	0.11108640277777777
003	AG	retprac	target	-0.0038399692307692357
003	AG	retprac	competitor	0.0026018615384615458
003	AG	restudy	target	-0.04118307042253522
003	AG	restudy	competitor	0.019900577464788734
004	AG	retprac	target	0.11400502857142857
004	AG	retprac	competitor	0.07694902857142857
004	AG	restudy	target	0.0667063188405797
004	AG	restudy	competitor	0.1380122463768116
005	AG	retprac	target	0.08589390909090909
005	AG	retprac	competitor	-0.008073545454545455
005	AG	restudy	target	0.0653584
005	AG	restudy	competitor	0.0765934
006	AG	retprac	target	0.07106663636363636
006	AG	retprac	competitor	-0.010345121212121217
006	AG	restudy	target	-0.04979448275862068
006	AG	restudy	competitor	-0.008344620689655175
007	AG	retprac	target	0.0779761343283582
007	AG	retprac	competitor	0.016776074626865676
007	AG	restudy	target	0.08136914492753623
007	AG	restudy	competitor	0.050918971014492755
008	AG	retprac	target	0.1597539014084507
008	AG	retprac	competitor	0.08823164788732395
008	AG	restudy	target	0.012624055555555555
008	AG	restudy	competitor	0.09632570833333333
009	AG	retprac	target	0.015160845070422533
009	AG	retprac	competitor	-0.0202179014084507
009	AG	restudy	target	0.08105834285714286
009	AG	restudy	competitor	0.04852424285714286
010	AG	retprac	target	0.10790999999999999
010	AG	retprac	competitor	0.07337905555555554
010	AG	restudy	target	0.1199683661971831
010	AG	restudy	competitor	0.05838946478873239
011	AG	retprac	target	-0.02275924242424242
011	AG	retprac	competitor	-0.05727924242424242
011	AG	restudy	target	-0.06411149122807017
011	AG	restudy	competitor	0.0336389298245614
012	AG	retprac	target	0.034802215384615386
012	AG	retprac	competitor	-0.02934715384615385
012	AG	restudy	target	0.09232376811594203
012	AG	restudy	competitor	0.11558226086956522
013	AG	retprac	target	-0.01738659090909091
013	AG	retprac	competitor	8.767424242424293e-4
013	AG	restudy	target	-0.03992409375
013	AG	restudy	competitor	-0.008678265625
014	AG	retprac	target	0.05657701515151514
014	AG	retprac	competitor	-0.009650242424242427
014	AG	restudy	target	-0.07638339062499999
014	AG	restudy	competitor	-0.059713859375000004
015	AG	retprac	target	-0.0032840000000000044
015	AG	retprac	competitor	-0.01122624561403509
015	AG	restudy	target	0.05805930188679245
015	AG	restudy	competitor	0.12659864150943395
016	AG	retprac	target	0.11976813793103448
016	AG	retprac	competitor	0.02264472413793104
016	AG	restudy	target	0.0324371875
016	AG	restudy	competitor	0.10859552083333333
017	AG	retprac	target	0.05609669014084507
017	AG	retprac	competitor	0.09855002816901408
017	AG	restudy	target	0.06425706153846154
017	AG	restudy	competitor	0.1272274923076923
018	AG	retprac	target	0.10462867605633802
018	AG	retprac	competitor	0.16080787323943663
018	AG	restudy	target	0.08243840845070423
018	AG	restudy	competitor	0.023327436619718315
019	AG	retprac	target	0.06218310447761194
019	AG	retprac	competitor	0.029953791044776124
019	AG	restudy	target	-0.008933550724637682
019	AG	restudy	competitor	-0.0024831884057971033
