# Supplementary material for: Retrieval practice facilitates memory updating by enhancing and differentiating medial prefrontal cortex representations
Source: eLife. 2020 May 18;9:e57023. doi: 10.7554/eLife.57023 (PMC7272192; doi:10.7554/eLife.57023)
Supplement: Figure 4—source data 1. [file elife-57023-fig4-data1.csv]

sub_id	roi_id	update_cond	subsequent_memory	reactivation_type	evidence
001	MPFC	retprac	target	target	0.11885607142857142
001	MPFC	retprac	target	competitor	0.010128542857142852
001	MPFC	retprac	competitor	target	0.004341353658536584
001	MPFC	retprac	competitor	competitor	0.021174743902439022
001	MPFC	restudy	target	target	0.06327828070175438
001	MPFC	restudy	target	competitor	0.028403105263157893
001	MPFC	restudy	competitor	target	0.05199323711340206
001	MPFC	restudy	competitor	competitor	-0.05627781443298969
002	MPFC	retprac	target	target	0.0726112688172043
002	MPFC	retprac	target	competitor	0.02927447311827957
002	MPFC	retprac	competitor	target	0.0646940989010989
002	MPFC	retprac	competitor	competitor	0.05808445054945054
002	MPFC	restudy	target	target	0.08809061538461538
002	MPFC	restudy	target	competitor	-0.03269951923076923
002	MPFC	restudy	competitor	target	0.10852539080459771
002	MPFC	restudy	competitor	competitor	-0.05523277011494253
003	MPFC	retprac	target	target	0.07296753153153154
003	MPFC	retprac	target	competitor	0.008739297297297301
003	MPFC	retprac	competitor	target	-0.036794600000000004
003	MPFC	retprac	competitor	competitor	-0.00482219999999999
003	MPFC	restudy	target	target	0.1270988604651163
003	MPFC	restudy	target	competitor	-0.07285897674418604
003	MPFC	restudy	competitor	target	0.06961417721518988
003	MPFC	restudy	competitor	competitor	-0.019453772151898727
004	MPFC	retprac	target	target	0.09875504310344826
004	MPFC	retprac	target	competitor	0.008871784482758617
004	MPFC	retprac	competitor	target	0.07566918333333333
004	MPFC	retprac	competitor	competitor	0.01719725
004	MPFC	restudy	target	target	0.1712536153846154
004	MPFC	restudy	target	competitor	-0.09099041538461539
004	MPFC	restudy	competitor	target	0.13489418518518517
004	MPFC	restudy	competitor	competitor	-0.02641927160493827
005	MPFC	retprac	target	target	0.12116577906976744
005	MPFC	retprac	target	competitor	0.0320361511627907
005	MPFC	retprac	competitor	target	0.03687860273972603
005	MPFC	retprac	competitor	competitor	0.06894983561643835
005	MPFC	restudy	target	target	-0.014998412698412704
005	MPFC	restudy	target	competitor	-0.07077646031746031
005	MPFC	restudy	competitor	target	0.07440008602150538
005	MPFC	restudy	competitor	competitor	-0.019572075268817202
006	MPFC	retprac	target	target	0.045344261538461536
006	MPFC	retprac	target	competitor	0.026078184615384616
006	MPFC	retprac	competitor	target	0.027393058823529416
006	MPFC	retprac	competitor	competitor	7.741764705882325e-4
006	MPFC	restudy	target	target	0.05572958064516129
006	MPFC	restudy	target	competitor	-0.07882637096774193
006	MPFC	restudy	competitor	target	0.0641856375
006	MPFC	restudy	competitor	competitor	-0.0329489625
007	MPFC	retprac	target	target	0.06338946739130435
007	MPFC	retprac	target	competitor	-0.047778173913043474
007	MPFC	retprac	competitor	target	0.09621634090909091
007	MPFC	retprac	competitor	competitor	0.021409545454545452
007	MPFC	restudy	target	target	-0.011579095744680851
007	MPFC	restudy	target	competitor	-0.030959595744680855
007	MPFC	restudy	competitor	target	0.033798140625
007	MPFC	restudy	competitor	competitor	-0.061651546875
008	MPFC	retprac	target	target	0.15562178151260503
008	MPFC	retprac	target	competitor	0.033982798319327726
008	MPFC	retprac	competitor	target	0.14658172413793102
008	MPFC	retprac	competitor	competitor	0.02582322988505747
008	MPFC	restudy	target	target	0.25487029787234045
008	MPFC	restudy	target	competitor	-0.02051972340425532
008	MPFC	restudy	competitor	target	0.24159291860465115
008	MPFC	restudy	competitor	competitor	-0.05755443023255814
009	MPFC	retprac	target	target	0.009275990740740741
009	MPFC	retprac	target	competitor	-0.0234907962962963
009	MPFC	retprac	competitor	target	0.06514500000000001
009	MPFC	retprac	competitor	competitor	0.0452014328358209
009	MPFC	restudy	target	target	0.03132285185185185
009	MPFC	restudy	target	competitor	-0.02555232098765432
009	MPFC	restudy	competitor	target	0.0102966
009	MPFC	restudy	competitor	competitor	-0.033667866666666664
010	MPFC	retprac	target	target	0.06739075247524752
010	MPFC	retprac	target	competitor	0.05348338613861386
010	MPFC	retprac	competitor	target	0.05014965822784811
010	MPFC	retprac	competitor	competitor	0.033134658227848106
010	MPFC	restudy	target	target	0.09223765263157895
010	MPFC	restudy	target	competitor	0.025458568421052635
010	MPFC	restudy	competitor	target	0.09167277777777777
010	MPFC	restudy	competitor	competitor	-0.030171925925925925
011	MPFC	retprac	target	target	0.07156098666666666
011	MPFC	retprac	target	competitor	0.042830426666666664
011	MPFC	retprac	competitor	target	-0.019938604166666672
011	MPFC	retprac	competitor	competitor	0.018618708333333334
011	MPFC	restudy	target	target	0.03449306060606061
011	MPFC	restudy	target	competitor	0.04918930303030303
011	MPFC	restudy	competitor	target	0.08594305263157895
011	MPFC	restudy	competitor	competitor	0.13258864912280702
012	MPFC	retprac	target	target	0.04947861956521739
012	MPFC	retprac	target	competitor	0.013022847826086958
012	MPFC	retprac	competitor	target	0.03155595744680851
012	MPFC	retprac	competitor	competitor	0.03362585106382979
012	MPFC	restudy	target	target	0.03554353571428572
012	MPFC	restudy	target	competitor	0.09554064285714285
012	MPFC	restudy	competitor	target	0.08945304761904761
012	MPFC	restudy	competitor	competitor	-0.012137533333333332
013	MPFC	retprac	target	target	0.06595214285714286
013	MPFC	retprac	target	competitor	0.012971547619047613
013	MPFC	retprac	competitor	target	-0.005815065217391302
013	MPFC	retprac	competitor	competitor	-0.014674891304347836
013	MPFC	restudy	target	target	0.14418209375
013	MPFC	restudy	target	competitor	0.09659117187499999
013	MPFC	restudy	competitor	target	0.10915769841269841
013	MPFC	restudy	competitor	competitor	-0.08577857142857143
014	MPFC	retprac	target	target	-0.004031054794520543
014	MPFC	retprac	target	competitor	-0.015268684931506852
014	MPFC	retprac	competitor	target	0.014810745454545452
014	MPFC	retprac	competitor	competitor	0.02638298181818182
014	MPFC	restudy	target	target	0.06761817741935483
014	MPFC	restudy	target	competitor	-0.0037075967741935483
014	MPFC	restudy	competitor	target	-0.050303746478873236
014	MPFC	restudy	competitor	competitor	-0.09668066197183098
015	MPFC	retprac	target	target	0.0876912
015	MPFC	retprac	target	competitor	0.03100606666666667
015	MPFC	retprac	competitor	target	-0.031329559322033906
015	MPFC	retprac	competitor	competitor	-0.07370137288135593
015	MPFC	restudy	target	target	-0.0038960392156862753
015	MPFC	restudy	target	competitor	0.011593294117647056
015	MPFC	restudy	competitor	target	0.086268
015	MPFC	restudy	competitor	competitor	0.046871216216216226
016	MPFC	retprac	target	target	0.031451958904109595
016	MPFC	retprac	target	competitor	0.08543467123287672
016	MPFC	retprac	competitor	target	0.06936553191489361
016	MPFC	retprac	competitor	competitor	0.04705834042553192
016	MPFC	restudy	target	target	0.2001056
016	MPFC	restudy	target	competitor	0.05830943636363637
016	MPFC	restudy	competitor	target	0.07353875342465753
016	MPFC	restudy	competitor	competitor	-0.0277626301369863
017	MPFC	retprac	target	target	0.07186280612244898
017	MPFC	retprac	target	competitor	0.03346811224489796
017	MPFC	retprac	competitor	target	0.06485522857142857
017	MPFC	retprac	competitor	competitor	0.017058514285714286
017	MPFC	restudy	target	target	-0.055828467532467535
017	MPFC	restudy	target	competitor	-0.04215215584415584
017	MPFC	restudy	competitor	target	0.065440776119403
017	MPFC	restudy	competitor	competitor	0.01867101492537313
018	MPFC	retprac	target	target	0.06732020388349515
018	MPFC	retprac	target	competitor	0.011253825242718448
018	MPFC	retprac	competitor	target	-0.015294308641975306
018	MPFC	retprac	competitor	competitor	-0.05756349382716049
018	MPFC	restudy	target	target	0.11969451648351649
018	MPFC	restudy	target	competitor	0.054670879120879125
018	MPFC	restudy	competitor	target	0.026939752688172044
018	MPFC	restudy	competitor	competitor	-0.09764403225806452
019	MPFC	retprac	target	target	0.05839782954545455
019	MPFC	retprac	target	competitor	0.08600470454545454
019	MPFC	retprac	competitor	target	0.05427557777777777
019	MPFC	retprac	competitor	competitor	0.040243511111111116
019	MPFC	restudy	target	target	0.017553765432098772
019	MPFC	restudy	target	competitor	-0.031644790123456785
019	MPFC	restudy	competitor	target	0.06571219298245613
019	MPFC	restudy	competitor	competitor	0.03531052631578947
001	VTC	retprac	target	target	0.1425618857142857
001	VTC	retprac	target	competitor	0.035334357142857153
001	VTC	retprac	competitor	target	0.13175664634146342
001	VTC	retprac	competitor	competitor	0.033754060975609755
001	VTC	restudy	target	target	0.4141228421052632
001	VTC	restudy	target	competitor	-3.538596491228554e-5
001	VTC	restudy	competitor	target	0.23575494845360825
001	VTC	restudy	competitor	competitor	-0.041737979381443295
002	VTC	retprac	target	target	0.17253279569892474
002	VTC	retprac	target	competitor	0.0895399247311828
002	VTC	retprac	competitor	target	0.14944372527472527
002	VTC	retprac	competitor	competitor	0.07439486813186813
002	VTC	restudy	target	target	0.33338872115384616
002	VTC	restudy	target	competitor	-0.05955086538461538
002	VTC	restudy	competitor	target	0.19005519540229884
002	VTC	restudy	competitor	competitor	-0.07924418390804598
003	VTC	retprac	target	target	0.15444546846846846
003	VTC	retprac	target	competitor	0.042914351351351354
003	VTC	retprac	competitor	target	0.03601145714285714
003	VTC	retprac	competitor	competitor	0.005444999999999992
003	VTC	restudy	target	target	0.4087196744186047
003	VTC	restudy	target	competitor	-0.02284762790697674
003	VTC	restudy	competitor	target	0.37647673417721517
003	VTC	restudy	competitor	competitor	0.020850139240506327
004	VTC	retprac	target	target	0.1671098275862069
004	VTC	retprac	target	competitor	-0.012598836206896549
004	VTC	retprac	competitor	target	0.05270161666666666
004	VTC	retprac	competitor	competitor	0.03853253333333332
004	VTC	restudy	target	target	0.3020835846153846
004	VTC	restudy	target	competitor	-0.050490430769230765
004	VTC	restudy	competitor	target	0.247475987654321
004	VTC	restudy	competitor	competitor	-0.052426543209876546
005	VTC	retprac	target	target	0.06952423255813954
005	VTC	retprac	target	competitor	-0.034633406976744184
005	VTC	retprac	competitor	target	0.18882294520547946
005	VTC	retprac	competitor	competitor	0.14415868493150685
005	VTC	restudy	target	target	0.24425920634920634
005	VTC	restudy	target	competitor	-5.135714285714303e-4
005	VTC	restudy	competitor	target	0.26144309677419353
005	VTC	restudy	competitor	competitor	-0.003586225806451608
006	VTC	retprac	target	target	0.1421311076923077
006	VTC	retprac	target	competitor	-0.008880461538461537
006	VTC	retprac	competitor	target	0.12650970588235294
006	VTC	retprac	competitor	competitor	0.0862448705882353
006	VTC	restudy	target	target	0.2868798709677419
006	VTC	restudy	target	competitor	0.020337935483870966
006	VTC	restudy	competitor	target	0.2391679625
006	VTC	restudy	competitor	competitor	-0.003525062500000005
007	VTC	retprac	target	target	0.09776321739130435
007	VTC	retprac	target	competitor	-0.009354380434782612
007	VTC	retprac	competitor	target	0.18165470454545454
007	VTC	retprac	competitor	competitor	-0.033105499999999996
007	VTC	restudy	target	target	0.32235293617021277
007	VTC	restudy	target	competitor	3.5307446808510755e-4
007	VTC	restudy	competitor	target	0.280794234375
007	VTC	restudy	competitor	competitor	-0.07990095312500001
008	VTC	retprac	target	target	0.30703742857142857
008	VTC	retprac	target	competitor	0.08844787394957984
008	VTC	retprac	competitor	target	0.17868883908045977
008	VTC	retprac	competitor	competitor	0.09705087356321838
008	VTC	restudy	target	target	0.47058132978723405
008	VTC	restudy	target	competitor	-0.002450021276595744
008	VTC	restudy	competitor	target	0.428742011627907
008	VTC	restudy	competitor	competitor	-0.02259127906976744
009	VTC	retprac	target	target	0.10881878703703704
009	VTC	retprac	target	competitor	0.02816100925925926
009	VTC	retprac	competitor	target	0.0545724776119403
009	VTC	retprac	competitor	competitor	0.04667740298507462
009	VTC	restudy	target	target	0.29877845679012344
009	VTC	restudy	target	competitor	-0.009706074074074077
009	VTC	restudy	competitor	target	0.31370768
009	VTC	restudy	competitor	competitor	-3.936666666666657e-4
010	VTC	retprac	target	target	0.003248346534653464
010	VTC	retprac	target	competitor	-0.04913841584158416
010	VTC	retprac	competitor	target	0.056425506329113924
010	VTC	retprac	competitor	competitor	0.0314003670886076
010	VTC	restudy	target	target	0.22429893684210528
010	VTC	restudy	target	competitor	-0.008873178947368422
010	VTC	restudy	competitor	target	0.11263708641975309
010	VTC	restudy	competitor	competitor	0.006761049382716052
011	VTC	retprac	target	target	0.17264766666666667
011	VTC	retprac	target	competitor	0.04578590666666667
011	VTC	retprac	competitor	target	0.1352388125
011	VTC	retprac	competitor	competitor	0.02228570833333333
011	VTC	restudy	target	target	0.33184372727272726
011	VTC	restudy	target	competitor	-0.07445331818181818
011	VTC	restudy	competitor	target	0.34815419298245615
011	VTC	restudy	competitor	competitor	0.10107256140350877
012	VTC	retprac	target	target	0.14262007608695654
012	VTC	retprac	target	competitor	0.04288308695652174
012	VTC	retprac	competitor	target	0.23332636170212767
012	VTC	retprac	competitor	competitor	0.05426276595744681
012	VTC	restudy	target	target	0.3667641071428571
012	VTC	restudy	target	competitor	0.033394
012	VTC	restudy	competitor	target	0.35102054285714285
012	VTC	restudy	competitor	competitor	0.011629866666666665
013	VTC	retprac	target	target	0.15423275
013	VTC	retprac	target	competitor	0.08928538095238096
013	VTC	retprac	competitor	target	0.18832117391304348
013	VTC	retprac	competitor	competitor	0.09566786956521739
013	VTC	restudy	target	target	0.54120640625
013	VTC	restudy	target	competitor	0.062400531249999995
013	VTC	restudy	competitor	target	0.332010619047619
013	VTC	restudy	competitor	competitor	-0.08524565079365079
014	VTC	retprac	target	target	0.15233090410958905
014	VTC	retprac	target	competitor	-0.0178596301369863
014	VTC	retprac	competitor	target	0.1201216909090909
014	VTC	retprac	competitor	competitor	0.09875636363636364
014	VTC	restudy	target	target	0.2880444677419355
014	VTC	restudy	target	competitor	-0.05964529032258065
014	VTC	restudy	competitor	target	0.28185918309859154
014	VTC	restudy	competitor	competitor	-0.08481959154929578
015	VTC	retprac	target	target	0.10449317777777778
015	VTC	retprac	target	competitor	0.010758711111111116
015	VTC	retprac	competitor	target	-0.05217610169491527
015	VTC	retprac	competitor	competitor	-0.12412401694915254
015	VTC	restudy	target	target	0.3184507843137255
015	VTC	restudy	target	competitor	0.0016239607843137273
015	VTC	restudy	competitor	target	0.20691924324324323
015	VTC	restudy	competitor	competitor	-0.04928382432432432
016	VTC	retprac	target	target	0.2657774520547945
016	VTC	retprac	target	competitor	0.05444278082191781
016	VTC	retprac	competitor	target	0.06218912765957446
016	VTC	retprac	competitor	competitor	-0.025191893617021278
016	VTC	restudy	target	target	0.47113398181818184
016	VTC	restudy	target	competitor	-0.008184490909090911
016	VTC	restudy	competitor	target	0.37296398630136984
016	VTC	restudy	competitor	competitor	-0.029011232876712322
017	VTC	retprac	target	target	0.18522411224489796
017	VTC	retprac	target	competitor	0.0037964999999999987
017	VTC	retprac	competitor	target	0.23648654285714285
017	VTC	retprac	competitor	competitor	0.08588481428571429
017	VTC	restudy	target	target	0.37567044155844154
017	VTC	restudy	target	competitor	0.04980472727272727
017	VTC	restudy	competitor	target	0.3529961194029851
017	VTC	restudy	competitor	competitor	0.0324156119402985
018	VTC	retprac	target	target	0.15200602912621358
018	VTC	retprac	target	competitor	0.012730786407766991
018	VTC	retprac	competitor	target	-0.005420666666666667
018	VTC	retprac	competitor	competitor	-0.017473580246913582
018	VTC	restudy	target	target	0.34304998901098904
018	VTC	restudy	target	competitor	0.007236582417582417
018	VTC	restudy	competitor	target	0.2846325483870968
018	VTC	restudy	competitor	competitor	-0.025925860215053765
019	VTC	retprac	target	target	0.08452406818181818
019	VTC	retprac	target	competitor	0.040436045454545454
019	VTC	retprac	competitor	target	0.043637533333333325
019	VTC	retprac	competitor	competitor	0.031290555555555544
019	VTC	restudy	target	target	0.18185164197530865
019	VTC	restudy	target	competitor	0.03582596296296296
019	VTC	restudy	competitor	target	0.09537838596491229
019	VTC	restudy	competitor	competitor	-0.02061864912280702
001	AG	retprac	target	target	0.09451454285714285
001	AG	retprac	target	competitor	0.015595157142857138
001	AG	retprac	competitor	target	0.10204943902439023
001	AG	retprac	competitor	competitor	0.020363292682926828
001	AG	restudy	target	target	0.1950951754385965
001	AG	restudy	target	competitor	-0.004076368421052638
001	AG	restudy	competitor	target	0.08269816494845361
001	AG	restudy	competitor	competitor	-0.02805322680412371
002	AG	retprac	target	target	0.036417741935483874
002	AG	retprac	target	competitor	0.023876892473118277
002	AG	retprac	competitor	target	0.10941967032967033
002	AG	retprac	competitor	competitor	0.1132677032967033
002	AG	restudy	target	target	0.12375766346153846
002	AG	restudy	target	competitor	-0.015487173076923075
002	AG	restudy	competitor	target	0.09745629885057472
002	AG	restudy	competitor	competitor	-0.023797344827586206
003	AG	retprac	target	target	0.12179554054054054
003	AG	retprac	target	competitor	0.056239036036036034
003	AG	retprac	competitor	target	0.08072397142857143
003	AG	retprac	competitor	competitor	0.04435382857142857
003	AG	restudy	target	target	0.3062588023255814
003	AG	restudy	target	competitor	-0.0701357558139535
003	AG	restudy	competitor	target	0.1594466582278481
003	AG	restudy	competitor	competitor	-0.019390582278481013
004	AG	retprac	target	target	0.12416210344827586
004	AG	retprac	target	competitor	-0.02842941379310345
004	AG	retprac	competitor	target	0.15219271666666667
004	AG	retprac	competitor	competitor	0.09624765
004	AG	restudy	target	target	0.28198436923076925
004	AG	restudy	target	competitor	0.004134569230769234
004	AG	restudy	competitor	target	0.27482071604938274
004	AG	restudy	competitor	competitor	-0.00590985185185185
005	AG	retprac	target	target	0.10084201162790699
005	AG	retprac	target	competitor	0.07965644186046511
005	AG	retprac	competitor	target	0.02455860273972603
005	AG	retprac	competitor	competitor	0.007869013698630141
005	AG	restudy	target	target	0.10046998412698413
005	AG	restudy	target	competitor	-0.020540904761904753
005	AG	restudy	competitor	target	0.1666541827956989
005	AG	restudy	competitor	competitor	-0.015354903225806455
006	AG	retprac	target	target	0.1003540153846154
006	AG	retprac	target	competitor	-0.03778215384615384
006	AG	retprac	competitor	target	0.07132068235294117
006	AG	retprac	competitor	competitor	0.022743976470588234
006	AG	restudy	target	target	0.11313524193548387
006	AG	restudy	target	competitor	0.042897209677419355
006	AG	restudy	competitor	target	0.1360432
006	AG	restudy	competitor	competitor	-0.003187237500000006
007	AG	retprac	target	target	0.08795773913043478
007	AG	retprac	target	competitor	0.048283217391304346
007	AG	retprac	competitor	target	-0.020536590909090914
007	AG	retprac	competitor	competitor	-0.006812363636363644
007	AG	restudy	target	target	0.16438540425531914
007	AG	restudy	target	competitor	-0.03754923404255319
007	AG	restudy	competitor	target	0.179432953125
007	AG	restudy	competitor	competitor	0.016117765624999995
008	AG	retprac	target	target	0.15949326050420168
008	AG	retprac	target	competitor	0.047117193277310926
008	AG	retprac	competitor	target	0.17715898850574713
008	AG	retprac	competitor	competitor	0.14701477011494254
008	AG	restudy	target	target	0.2824102234042553
008	AG	restudy	target	competitor	-0.04492482978723404
008	AG	restudy	competitor	target	0.26113482558139534
008	AG	restudy	competitor	competitor	-0.10143865116279069
009	AG	retprac	target	target	0.0313215462962963
009	AG	retprac	target	competitor	0.005630101851851852
009	AG	retprac	competitor	target	0.07935831343283582
009	AG	retprac	competitor	competitor	0.08017855223880598
009	AG	restudy	target	target	0.19155243209876543
009	AG	restudy	target	competitor	0.055401876543209876
009	AG	restudy	competitor	target	0.13912933333333333
009	AG	restudy	competitor	competitor	-0.009976559999999997
010	AG	retprac	target	target	0.0914921188118812
010	AG	retprac	target	competitor	0.06567020792079208
010	AG	retprac	competitor	target	0.041101240506329115
010	AG	retprac	competitor	competitor	0.06905384810126582
010	AG	restudy	target	target	0.1427504
010	AG	restudy	target	competitor	-0.004595957894736842
010	AG	restudy	competitor	target	0.16650008641975308
010	AG	restudy	competitor	competitor	-0.023295864197530863
011	AG	retprac	target	target	0.02018441333333333
011	AG	retprac	target	competitor	-0.016144466666666666
011	AG	retprac	competitor	target	0.09761966666666666
011	AG	retprac	competitor	competitor	0.012324083333333333
011	AG	restudy	target	target	0.09753648484848484
011	AG	restudy	target	competitor	-0.0452465303030303
011	AG	restudy	competitor	target	0.06685852631578948
011	AG	restudy	competitor	competitor	0.011954070175438597
012	AG	retprac	target	target	0.13485095652173915
012	AG	retprac	target	competitor	0.08890701086956522
012	AG	retprac	competitor	target	0.0999270425531915
012	AG	retprac	competitor	competitor	0.07685372340425532
012	AG	restudy	target	target	0.15879932142857142
012	AG	restudy	target	competitor	-0.021473357142857138
012	AG	restudy	competitor	target	0.14972853333333333
012	AG	restudy	competitor	competitor	-0.018478809523809526
013	AG	retprac	target	target	0.11817978571428571
013	AG	retprac	target	competitor	0.03215546428571428
013	AG	retprac	competitor	target	0.09412882608695652
013	AG	retprac	competitor	competitor	0.0849344347826087
013	AG	restudy	target	target	0.2193499375
013	AG	restudy	target	competitor	0.11099484375
013	AG	restudy	competitor	target	0.1505011746031746
013	AG	restudy	competitor	competitor	-0.016630730158730157
014	AG	retprac	target	target	0.02811346575342466
014	AG	retprac	target	competitor	-0.008695561643835614
014	AG	retprac	competitor	target	0.0620044
014	AG	retprac	competitor	competitor	0.04110998181818182
014	AG	restudy	target	target	0.065101
014	AG	restudy	target	competitor	0.029147403225806456
014	AG	restudy	competitor	target	0.13733521126760564
014	AG	restudy	competitor	competitor	0.013268633802816898
015	AG	retprac	target	target	0.05372246666666667
015	AG	retprac	target	competitor	-0.03407594444444444
015	AG	retprac	competitor	target	0.03364245762711864
015	AG	retprac	competitor	competitor	-0.04499862711864407
015	AG	restudy	target	target	0.10928886274509804
015	AG	restudy	target	competitor	0.013294313725490187
015	AG	restudy	competitor	target	0.15966506756756757
015	AG	restudy	competitor	competitor	-0.059320027027027024
016	AG	retprac	target	target	0.09194808219178083
016	AG	retprac	target	competitor	0.03126298630136985
016	AG	retprac	competitor	target	0.13952378723404255
016	AG	retprac	competitor	competitor	0.001264276595744683
016	AG	restudy	target	target	0.30598423636363636
016	AG	restudy	target	competitor	0.08250294545454545
016	AG	restudy	competitor	target	0.24804928767123288
016	AG	restudy	competitor	competitor	-0.01763256164383561
017	AG	retprac	target	target	0.12036301020408163
017	AG	retprac	target	competitor	0.02979472448979592
017	AG	retprac	competitor	target	0.1607515
017	AG	retprac	competitor	competitor	0.05569982857142857
017	AG	restudy	target	target	0.30847105194805197
017	AG	restudy	target	competitor	0.08690987012987013
017	AG	restudy	competitor	target	0.3190695074626866
017	AG	restudy	competitor	competitor	0.05751494029850746
018	AG	retprac	target	target	0.0714781650485437
018	AG	retprac	target	competitor	-0.009460815533980588
018	AG	retprac	competitor	target	-0.06789287654320987
018	AG	retprac	competitor	competitor	-0.02321135802469136
018	AG	restudy	target	target	0.187162
018	AG	restudy	target	competitor	0.02556421978021978
018	AG	restudy	competitor	target	0.11019545161290323
018	AG	restudy	competitor	competitor	-0.022778677419354843
019	AG	retprac	target	target	0.0804642840909091
019	AG	retprac	target	competitor	0.1045085
019	AG	retprac	competitor	target	-0.034886266666666665
019	AG	retprac	competitor	competitor	0.09161628888888888
019	AG	restudy	target	target	0.11288897530864198
019	AG	restudy	target	competitor	0.022705469135802465
019	AG	restudy	competitor	target	0.060497964912280704
019	AG	restudy	competitor	competitor	-0.06812331578947368
001	HPC	retprac	target	target	-0.015349342857142853
001	HPC	retprac	target	competitor	0.02576021428571429
001	HPC	retprac	competitor	target	0.027603524390243904
001	HPC	retprac	competitor	competitor	0.01464207317073171
001	HPC	restudy	target	target	0.05430070175438596
001	HPC	restudy	target	competitor	0.002776842105263159
001	HPC	restudy	competitor	target	0.04154748453608247
001	HPC	restudy	competitor	competitor	0.006568371134020616
002	HPC	retprac	target	target	0.05881390322580645
002	HPC	retprac	target	competitor	0.03339787096774194
002	HPC	retprac	competitor	target	0.09566516483516484
002	HPC	retprac	competitor	competitor	0.06814901098901098
002	HPC	restudy	target	target	-5.245865384615379e-4
002	HPC	restudy	target	competitor	-0.05231403846153846
002	HPC	restudy	competitor	target	0.06087457471264369
002	HPC	restudy	competitor	competitor	-7.048390804597695e-4
003	HPC	retprac	target	target	0.051489279279279286
003	HPC	retprac	target	competitor	-0.017914792792792792
003	HPC	retprac	competitor	target	0.043993171428571426
003	HPC	retprac	competitor	competitor	0.0073889142857142785
003	HPC	restudy	target	target	0.18494652325581395
003	HPC	restudy	target	competitor	-0.01119510465116279
003	HPC	restudy	competitor	target	0.1227126835443038
003	HPC	restudy	competitor	competitor	0.01135741772151899
004	HPC	retprac	target	target	0.05427766379310345
004	HPC	retprac	target	competitor	0.008428939655172416
004	HPC	retprac	competitor	target	0.02512286666666667
004	HPC	retprac	competitor	competitor	-0.005478599999999999
004	HPC	restudy	target	target	0.19116403076923077
004	HPC	restudy	target	competitor	0.04327356923076923
004	HPC	restudy	competitor	target	0.11537511111111112
004	HPC	restudy	competitor	competitor	-0.045483691358024686
005	HPC	retprac	target	target	0.04989280232558139
005	HPC	retprac	target	competitor	0.03749875581395349
005	HPC	retprac	competitor	target	0.06535032876712328
005	HPC	retprac	competitor	competitor	0.04347575342465753
005	HPC	restudy	target	target	0.07633493650793652
005	HPC	restudy	target	competitor	0.02646484126984127
005	HPC	restudy	competitor	target	0.038034118279569894
005	HPC	restudy	competitor	competitor	-0.0449036129032258
006	HPC	retprac	target	target	0.042697569230769235
006	HPC	retprac	target	competitor	-0.006917523076923075
006	HPC	retprac	competitor	target	0.061265200000000006
006	HPC	retprac	competitor	competitor	0.038466294117647064
006	HPC	restudy	target	target	0.11841001612903225
006	HPC	restudy	target	competitor	0.02538824193548387
006	HPC	restudy	competitor	target	0.04512512500000001
006	HPC	restudy	competitor	competitor	-0.006286449999999997
007	HPC	retprac	target	target	0.06399871739130435
007	HPC	retprac	target	competitor	0.0176693152173913
007	HPC	retprac	competitor	target	0.08922936363636363
007	HPC	retprac	competitor	competitor	0.021591863636363638
007	HPC	restudy	target	target	0.12090058510638298
007	HPC	restudy	target	competitor	-0.014545053191489361
007	HPC	restudy	competitor	target	0.122265015625
007	HPC	restudy	competitor	competitor	-0.033359125
008	HPC	retprac	target	target	0.04090419327731092
008	HPC	retprac	target	competitor	-0.03564510924369748
008	HPC	retprac	competitor	target	0.0948410459770115
008	HPC	retprac	competitor	competitor	0.07253774712643679
008	HPC	restudy	target	target	0.07492982978723403
008	HPC	restudy	target	competitor	-0.015417627659574471
008	HPC	restudy	competitor	target	0.10927267441860465
008	HPC	restudy	competitor	competitor	-0.004515383720930233
009	HPC	retprac	target	target	0.02263951851851852
009	HPC	retprac	target	competitor	0.013798620370370369
009	HPC	retprac	competitor	target	-0.018789567164179104
009	HPC	retprac	competitor	competitor	-0.0030835223880597037
009	HPC	restudy	target	target	0.09370686419753087
009	HPC	restudy	target	competitor	0.0013229506172839482
009	HPC	restudy	competitor	target	0.11772717333333334
009	HPC	restudy	competitor	competitor	0.007123759999999996
010	HPC	retprac	target	target	-0.03448871287128713
010	HPC	retprac	target	competitor	-0.03245959405940594
010	HPC	retprac	competitor	target	-0.040012696202531645
010	HPC	retprac	competitor	competitor	-0.043534316455696206
010	HPC	restudy	target	target	0.018349431578947372
010	HPC	restudy	target	competitor	0.015294000000000002
010	HPC	restudy	competitor	target	0.032722259259259256
010	HPC	restudy	competitor	competitor	0.021965802469135803
011	HPC	retprac	target	target	0.07202426666666667
011	HPC	retprac	target	competitor	0.04600684
011	HPC	retprac	competitor	target	0.04915960416666667
011	HPC	retprac	competitor	competitor	0.005795520833333329
011	HPC	restudy	target	target	0.024265727272727276
011	HPC	restudy	target	competitor	-0.03643386363636363
011	HPC	restudy	competitor	target	0.12470519298245614
011	HPC	restudy	competitor	competitor	0.056656052631578954
012	HPC	retprac	target	target	-0.01445435869565217
012	HPC	retprac	target	competitor	-0.022710934782608695
012	HPC	retprac	competitor	target	0.12383468085106383
012	HPC	retprac	competitor	competitor	0.05471874468085106
012	HPC	restudy	target	target	0.09421883928571428
012	HPC	restudy	target	competitor	0.05505775
012	HPC	restudy	competitor	target	0.0734978
012	HPC	restudy	competitor	competitor	7.630095238095222e-4
013	HPC	retprac	target	target	0.027666273809523804
013	HPC	retprac	target	competitor	0.01892814285714286
013	HPC	retprac	competitor	target	0.0206893695652174
013	HPC	retprac	competitor	competitor	-0.01061771739130434
013	HPC	restudy	target	target	0.17742490625000001
013	HPC	restudy	target	competitor	0.08877990625
013	HPC	restudy	competitor	target	0.0703142380952381
013	HPC	restudy	competitor	competitor	-0.013953079365079364
014	HPC	retprac	target	target	0.04235408219178082
014	HPC	retprac	target	competitor	-0.018001506849315067
014	HPC	retprac	competitor	target	0.07954861818181819
014	HPC	retprac	competitor	competitor	0.06174221818181818
014	HPC	restudy	target	target	0.0939465
014	HPC	restudy	target	competitor	0.03565646774193549
014	HPC	restudy	competitor	target	0.09141404225352112
014	HPC	restudy	competitor	competitor	0.0019570704225352086
015	HPC	retprac	target	target	0.040448866666666666
015	HPC	retprac	target	competitor	0.014481200000000005
015	HPC	retprac	competitor	target	-0.06262703389830508
015	HPC	retprac	competitor	competitor	-0.11715630508474575
015	HPC	restudy	target	target	0.025561078431372546
015	HPC	restudy	target	competitor	-0.00754821568627452
015	HPC	restudy	competitor	target	0.012204324324324327
015	HPC	restudy	competitor	competitor	-0.010014324324324322
016	HPC	retprac	target	target	0.039811
016	HPC	retprac	target	competitor	0.00489079452054795
016	HPC	retprac	competitor	target	0.03377217021276596
016	HPC	retprac	competitor	competitor	0.06702829787234044
016	HPC	restudy	target	target	0.09301941818181818
016	HPC	restudy	target	competitor	-0.022551563636363636
016	HPC	restudy	competitor	target	0.07728583561643836
016	HPC	restudy	competitor	competitor	-0.03528556164383562
017	HPC	retprac	target	target	-0.02381233673469388
017	HPC	retprac	target	competitor	-0.04264009183673469
017	HPC	retprac	competitor	target	0.07211422857142857
017	HPC	retprac	competitor	competitor	0.01488579999999999
017	HPC	restudy	target	target	0.04292427272727272
017	HPC	restudy	target	competitor	0.08119042857142857
017	HPC	restudy	competitor	target	0.01816155223880597
017	HPC	restudy	competitor	competitor	0.023172701492537313
018	HPC	retprac	target	target	-0.06458553398058252
018	HPC	retprac	target	competitor	-0.03099409708737864
018	HPC	retprac	competitor	target	0.02503340740740741
018	HPC	retprac	competitor	competitor	-0.018986839506172838
018	HPC	restudy	target	target	0.04310394505494505
018	HPC	restudy	target	competitor	-0.021069824175824172
018	HPC	restudy	competitor	target	0.06534196774193549
018	HPC	restudy	competitor	competitor	-0.007489731182795701
019	HPC	retprac	target	target	0.033922068181818185
019	HPC	retprac	target	competitor	-0.018580897727272727
019	HPC	retprac	competitor	target	-0.0814039111111111
019	HPC	retprac	competitor	competitor	-0.013384311111111111
019	HPC	restudy	target	target	0.03435848148148149
019	HPC	restudy	target	competitor	0.04384248148148148
019	HPC	restudy	competitor	target	0.018849140350877192
019	HPC	restudy	competitor	competitor	0.014174263157894728
